# Supplementary material for: Preclinical Evaluation of Chicken Egg Yolk Antibody (IgY) Anti-RBD Spike SARS-CoV-2—A Candidate for Passive Immunization against COVID-19
Source: MDPI journal article supplement (doi:10.3390/vaccines10010128), 2022-01-17
Supplement: s1 [file s1]

# Supplementary Materials: Preclinical Evaluation of Chicken Egg Yolk Antibody (IgY) Anti-RBD Spike SARS-CoV-2 – A Candidate for Passive Immunization against COVID-19

Hendris Wongso <sup>1</sup>, Isa Mahendra <sup>1</sup>, Wyanda Arnafia <sup>2</sup>, Idar Idar <sup>3</sup>, Muhammad Yusuf <sup>4,5</sup>, Arifudin Achmad <sup>6</sup>, Holis A. Holik <sup>7</sup>, Ahmad Kurniawan <sup>1</sup>, Iim Halimah <sup>1</sup>, Maula E. Sriyani <sup>1</sup>, Teguh H. A. Wibawa <sup>1</sup>, Muhamad B. Febrian <sup>1</sup>, Yanuar Setiadi <sup>1</sup>, Eva M. Widyasari <sup>1</sup>, Isti Daruwati <sup>1</sup>, Crhisterra E. Kusumaningrum <sup>1</sup>, Toto Subroto <sup>4,5,\*</sup>

<sup>1</sup> Research and Technology Center for Applied Nuclear, National Research and Innovation Agency, Jl. Tamansari No. 71, Lb. Siliwangi, Coblong, Bandung 40132, Indonesia; hendriswongso@batan.go.id

<sup>2</sup> Veterinary Pharmaceutical Industry, PT. Tekad Mandiri Citra, Jl. Mekar Raya Kav. 9, Bandung 40614, Indonesia; wyandaa@gmail.com

<sup>3</sup> Faculty of Pharmacy, Universitas Bhakti Kencana, Jl. Soekarno-Hatta No. 754, Bandung 40614, Indonesia; idar@bku.ac.id

<sup>4</sup> Department of Chemistry, Faculty of Mathematics and Natural Sciences, Universitas Padjadjaran, Jl Raya Bandung Sumedang Km 21, Jatinangor, Sumedang 45363, Indonesia; m.yusuf@unpad.ac.id

<sup>5</sup> Research Center for Molecular Biotechnology and Bioinformatics, Universitas Padjadjaran, Jalan Singaperbangsa No. 2, Bandung 40132

<sup>6</sup> Department of Nuclear Medicine and Molecular Theranostics, Faculty of Medicine, Universitas Padjadjaran/Hasan Sadikin General Hospital, Jl. Pasteur No. 38, Bandung 40161; a.achmad@unpad.ac.id

<sup>7</sup> Department of Pharmaceutical Analysis and Medicinal Chemistry, Faculty of Pharmacy, Universitas Padjadjaran, Jl. Bandung-Sumedang Km 21, Jatinangor, Sumedang 45363; holis@unpad.ac.id

\* Correspondence: t.subroto@unpad.ac.id

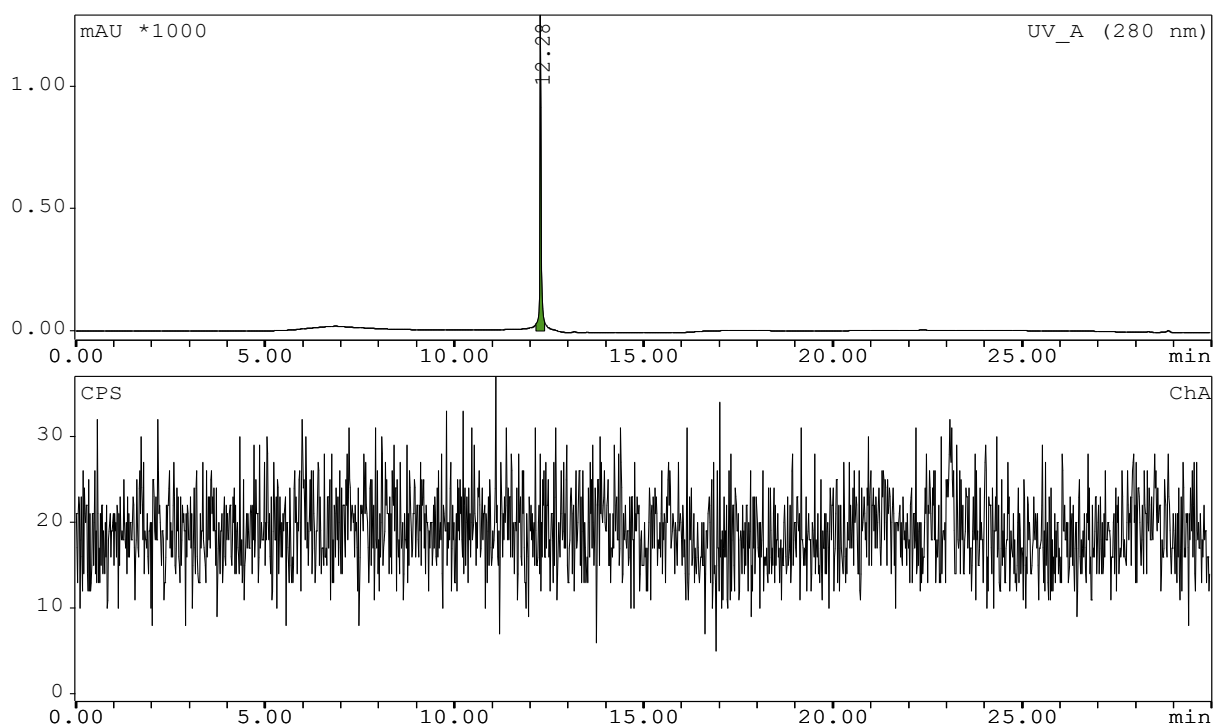

**Figure S1.** HPLC chromatogram of the standard IgY (RT = 12.28 min).

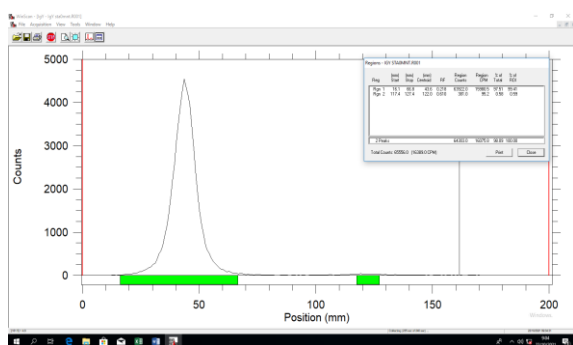

0 min

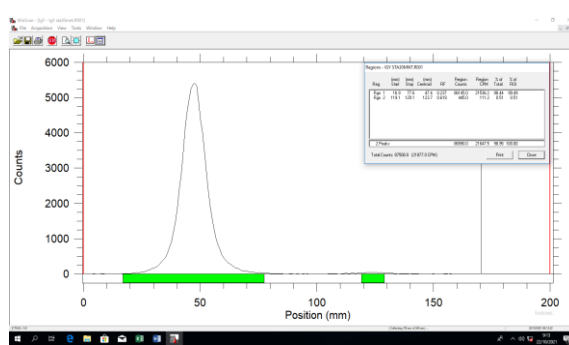

30 min

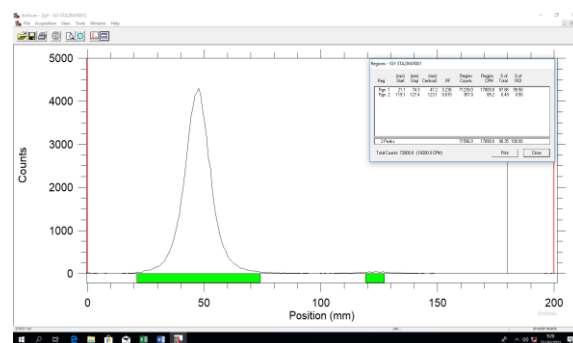

120 min

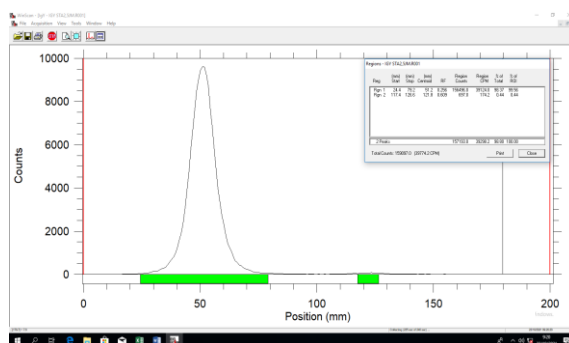

150 min

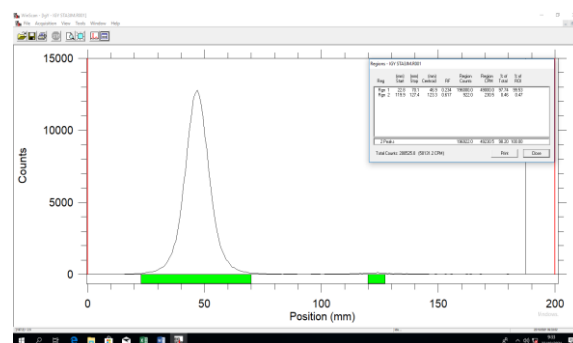

180 min

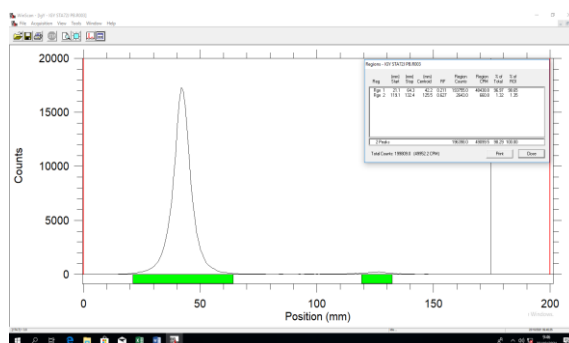

24 h

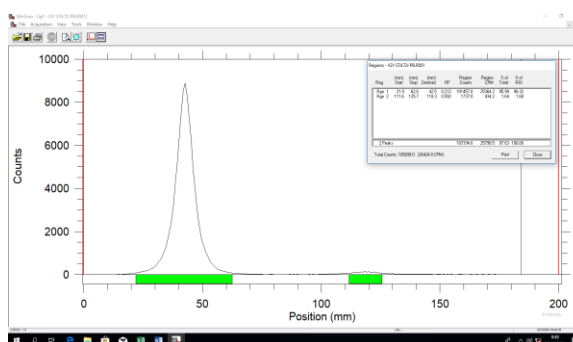

48 h

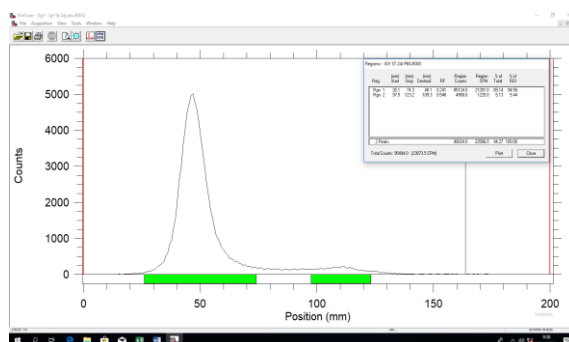

72 h

**Figure S2.** Representative TLC chromatograms for stability studies of  $[^{125}\text{I}]$ -IgY anti-RBD spike SARS-CoV-2 in phosphate buffer saline (PBS) over 72 h.

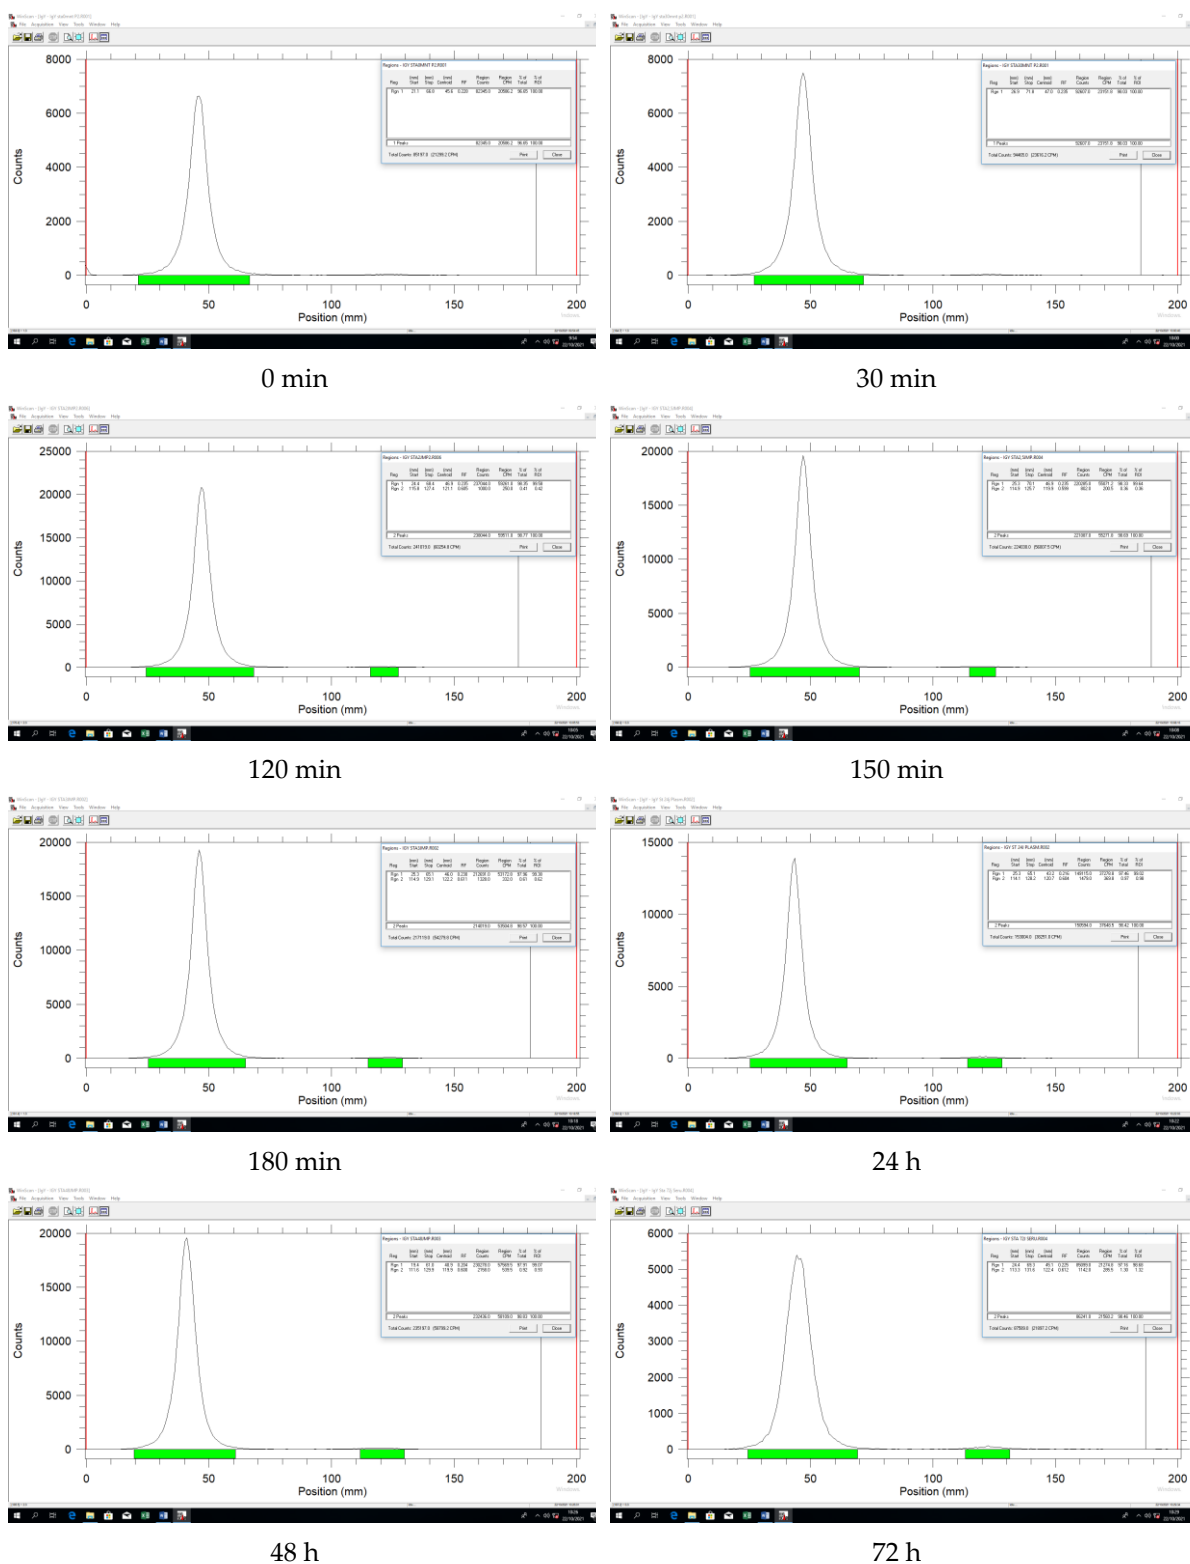

**Figure S3.** Representative TLC chromatograms for stability studies of  $[^{131}\text{I}]$ -IgY anti-RBD spike SARS-CoV-2 in human serum over 72 h.

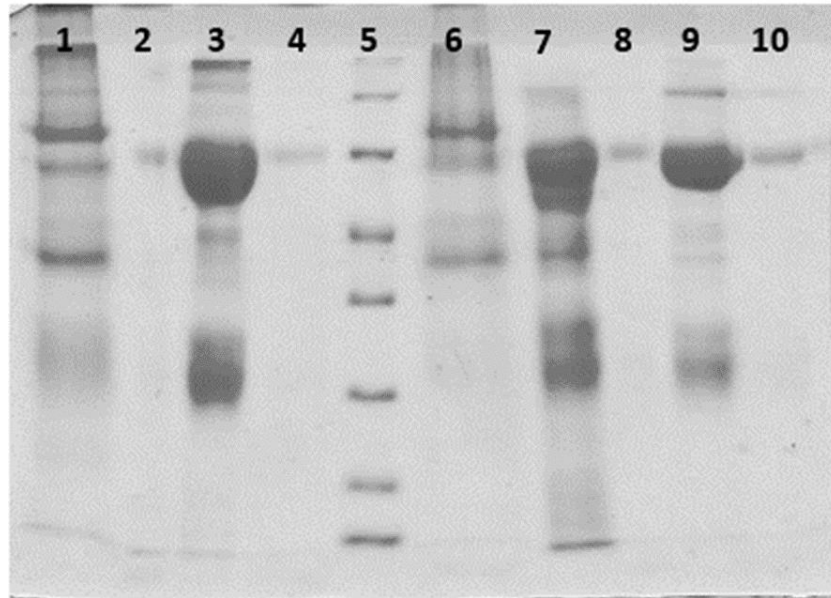

**Figure S4.** Identification and SDS-PAGE patterns of IgY anti-RBD spike SARS-CoV-2. Peak 1, gradient elution method (lane 1); Peak 3, gradient elution method (lane 2); ultrafiltrated peak 2, gradient elution method (lane 3); filtrate of ultrafiltrated peak 2, gradient elution method (lane 4); Protein marker (lane 5); peak 1, isocratic elution method (lane 6); peak 2, isocratic elution method (lane 7); peak 3, isocratic elution method (lane 8); ultrafiltrated of peak 2, isocratic elution method (lane 9); filtrate of peak 2, isocratic elution method.

**Table S1.** Lipophilicity (Log  $P$ ) of [ $^{131}\text{I}$ ]-IgY anti-RBD spike SARS-CoV-2.

| Radioactivity (count per min) |              | $P$                               | Log $P$ |
|-------------------------------|--------------|-----------------------------------|---------|
| Octanol                       | NaCl (water) |                                   |         |
| 706                           | 66393        | 0.0047                            | -2.33   |
| 510                           | 72839        | 0.0015                            | -2.82   |
| 472                           | 49271        | 0.0015                            | -2.82   |
|                               |              | Log $P$ (mean) = $-2.66 \pm 0.28$ |         |
